# Supplementary material for: Considering biology when inferring range-limiting stress mechanisms for agricultural pests: a case study of the beet armyworm
Source: Springer Nature journal article supplement (doi:10.1007/s10340-017-0938-9), 2018-01-17
Supplement: 10340_2017_938_MOESM2_ESM.pdf [file 10340_2017_938_MOESM2_ESM.pdf]

## Considering biology when inferring range-limiting stress mechanisms for agricultural pests: a case study of the beet armyworm

Tania Yonow<sup>1,2</sup>, Darren J. Kriticos<sup>1,2</sup>, Natalia Kirichenko<sup>3,4</sup> and Noboru Ota<sup>5</sup>

<sup>1</sup>HarvestChoice, InSTePP, University of Minnesota, St. Paul, MN 55108 USA

<sup>2</sup>CSIRO, GPO Box 1700, Canberra ACT 2600, Australia

<sup>3</sup>Sukachev Institute of Forest, Siberian Branch of the Russian Academy of Sciences, Forest Zoology Department, Akademgorodok 50/28, Krasnoyarsk, 660036, Russia

<sup>4</sup>Siberian Federal University, 79 Svobodny pr., 660041, Krasnoyarsk, Russia

<sup>5</sup>CSIRO, Private Bag 5, Wembley, WA 6913, Australia

Corresponding authors: Tania Yonow, [Tania.Yonow@csiro.au](mailto:Tania.Yonow@csiro.au), Tel +61 (0)2 6246 4417 and  
Darren Kriticos, [Darren.kriticos@csiro.au](mailto:Darren.kriticos@csiro.au), Tel: +61 (0)2 6246 4252

Journal of Pest Science 2017

Electronic Supplementary Material 2

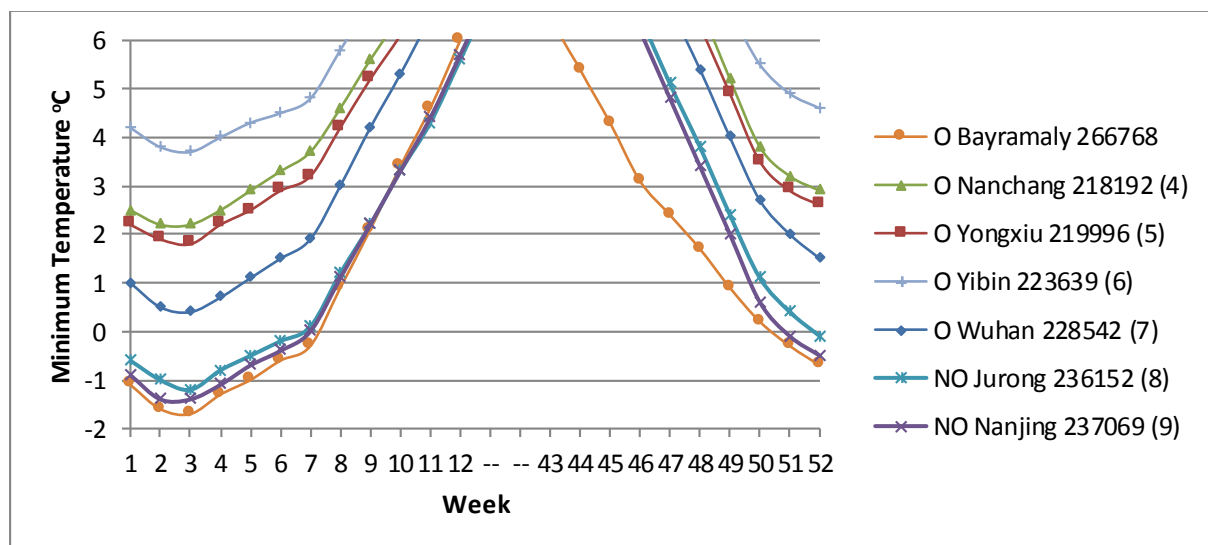

**Online Material 2** Minimum temperatures at selected sites in China (Zheng et al. 2012) and at Bayramaly (Kurdov 1986; Zheng et al. 2011a). O indicates overwintering site; NO indicates non-overwintering site; CliMond grid cell number included; number in parentheses matches location number in Fig. 3 of Zheng et al. (2012) (Fig. 1 of this paper).
